# Supplementary material
Source: MDPI journal article supplement (https://www.mdpi.com/2076-3417/11/4/1891)
Supplement: s1 [file s1]

# Supplementary Materials: Critical view on buffer layer formation and monolayer graphene properties in high-temperature sublimation

Vallery Stanishev <sup>1</sup>, Nerijus Armakavicius <sup>1,2</sup>, Chamseddine Bouhafs <sup>1</sup>, Camilla Coletti <sup>3</sup>, Philipp Kühne <sup>1,2</sup>, Ivan G. Ivanov <sup>4</sup>, Alexei A. Zakharov <sup>5</sup>, Rositsa Yakimova <sup>4</sup> and Vanya Darakchieva <sup>1,2,\*</sup>

Figure S1 shows very similar step height distribution for the buffer layers with the lowest  $T_{Ar} = 800\text{ }^{\circ}\text{C}$  and the highest  $T_{Ar} = 1300\text{ }^{\circ}\text{C}$ , and show no indication of etching. We have also shown earlier that in our growth process, where the inert Ar atmosphere surrounds the SiC substrate in a very tightly closed cavity (no flow), Ar does not contribute to etching up to  $1800\text{ }^{\circ}\text{C}$  even for a duration of 1 h [Ref. 45]. We note that the buffer layers investigated in our manuscript are obtained at or below  $1800\text{ }^{\circ}\text{C}$  for zero growth time.

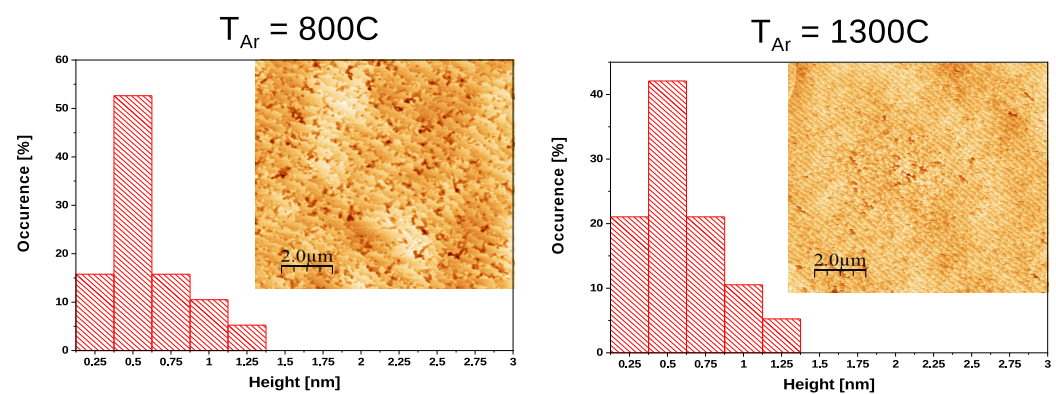

**Figure S1.** Step height distributions for samples growth with  $T_{Ar} = 800\text{ }^{\circ}\text{C}$  and  $T_{Ar} = 1300\text{ }^{\circ}\text{C}$  on SI 4H-SiC. Respective representative AFM images are shown in the insets.
